# Supplementary material
Source: PubMed Central journal article supplement (PMC2849961)
Supplement: tjp0588-0953-SD1.pdf [file tjp0588-0953-SD1.pdf]

**Supplemental File**

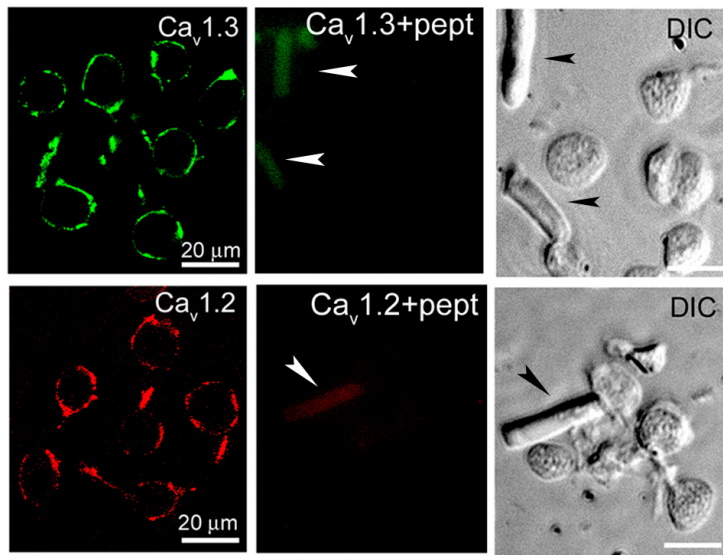

**Fig.1**

**Fig.1.** Confocal immunofluorescence images of salamander retinal neurons labeled for Cav1.3 (green) or Cav1.2 (red). For negative controls, the primary antibodies were either omitted from the procedure or were pre-absorbed with the appropriate peptides. Nonspecific staining of photoreceptor outer segments is marked by arrowheads in preabsorbing fluorescence and corresponding DIC image.

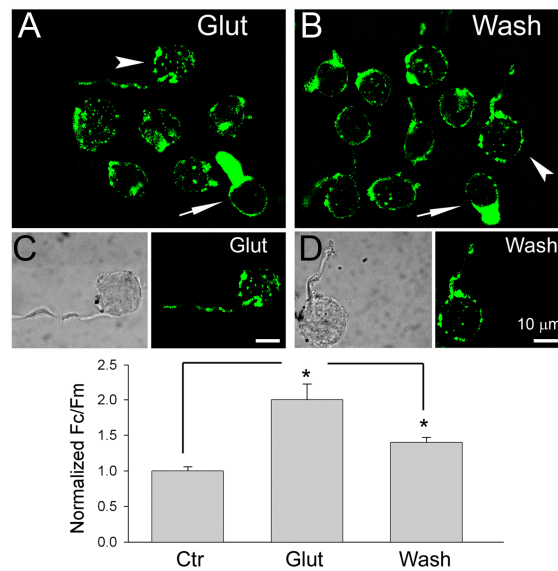

**Fig.2**

**Fig.2.** Subcellular distribution of Cav1.3 was determined by fixing and labeling dissociated cells either following 5 min application of glutamate (A), or after 20-30 min washing glutamate from Ringer solution (B). Representative cells selected from 3 different experiments are mounted in panels A and B. Fluorescence and corresponding DIC images of third-order retinal neurons (marked by arrowheads) are presented (C, D). Glutamate had no effect on subcellular distribution of Cav1.3 in photoreceptors (arrows). Non-specific staining of outer segments is characteristic for salamander photoreceptors.

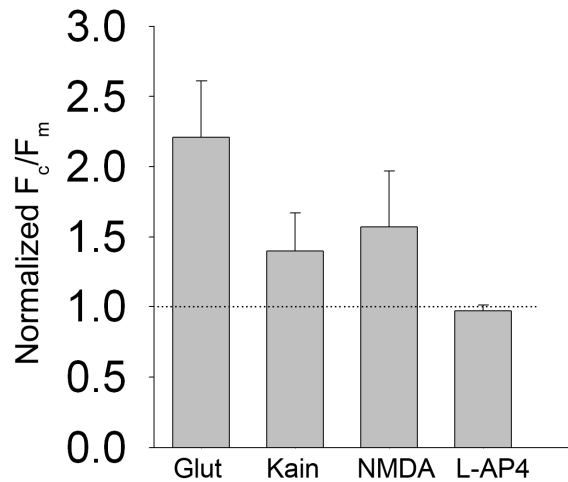

Fig.3

**Fig.3** Activation of group III metabotropic receptors by L-AP4 failed to induce detectable internalization of  $Ca_v1.3$  channels.
